# Supplementary material for: Conversion of SPORL pretreated Douglas fir forest residues into microbial lipids with oleaginous yeasts
Source: Royal Society of Chemistry journal article supplement (doi:10.1039/c5ra24430g), 2016-01-01
Supplement: c5ra24430g1.pdf [file c5ra24430g1.pdf]

## Supplementary Results

**Table S1.** Results for growth of *L. tetrasporus* on 60%v/v normal SPORL-EH using a seed culture grown in the presence of 0 – 40%v/v of the same SPORL-EH

| Trial           | Seed Culture<br>% SPORL | Production Culture<br>% SPORL <sup>2</sup> | Data for Production Cultures <sup>1</sup> |                   | Final Biomass<br>OD <sub>600</sub> |
|-----------------|-------------------------|--------------------------------------------|-------------------------------------------|-------------------|------------------------------------|
|                 |                         |                                            | Glucose<br>% used                         | Man/Xyl<br>% used |                                    |
| 1A              | 0%                      | 60%                                        | 0.0                                       | 0.0               | 3.48                               |
| 1B              | 0%                      | 60%                                        | 0.0                                       | 0.0               | 2.01                               |
| 2A              | 10%                     | 60%                                        | 0.0                                       | 0.0               | 2.31                               |
| 2B              | 10%                     | 60%                                        | 0.0                                       | 0.0               | 2.05                               |
| 3A              | 20%                     | 60%                                        | 94.3                                      | 52.5              | 19.6                               |
| 3B              | 20%                     | 60%                                        | 51.6                                      | 0.0               | 15.1                               |
| 4A              | 40%                     | 60%                                        | 100                                       | 89.1              | 24.2                               |
| 4B              | 40%                     | 60%                                        | 100                                       | 100               | 22.3                               |
| 5A <sup>3</sup> | 0%                      | 0%                                         | 100                                       | 62.6              | 18.3                               |
| 5B              | 0%                      | 0%                                         | 100                                       | 71.9              | 18.6                               |

<sup>1</sup>cultures were grown for 5 days

<sup>2</sup>seed cultures were grown YPD supplemented with 0-40% SPORL-EH.

<sup>3</sup>synthetic SPORL medium control

Table S2. Fatty acid profiles for sequential batch cultures (%w/w)

---

| <u>Fatty Acid</u> | <u>0.5 x Media A</u> | <u>1.0 x Media A</u> |
|-------------------|----------------------|----------------------|
| 16:0              | 22.9±2.6             | 24.6±1.5             |
| 16:1              | 2.9±0.4              | 3.4±0.3              |
| 18:0              | 19.9±9.3             | 13.2±5.4             |
| 18:1              | 41.4±6.1             | 49.7±5.2             |
| 18:1w6            | 1.4±0.2              | 1.2±0.3              |
| 18:3w9,12         | 2.9±1.5              | 1.5±0.4              |
| Others            | 8.6±1.5              | 6.4±1.6              |

---

Supplemental Results

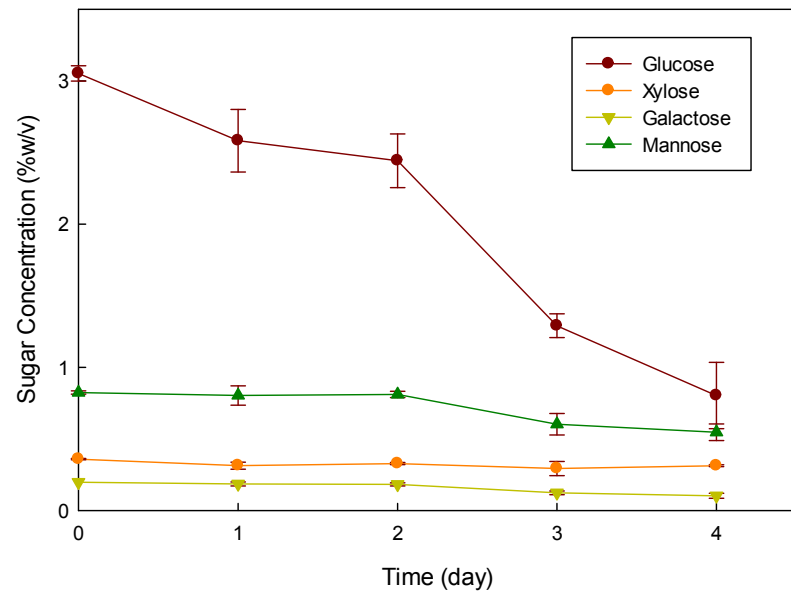

Figure S1A: sugar time profile for acclimated *Y. lipolytica* culture grown on normal profile hydrolysate .

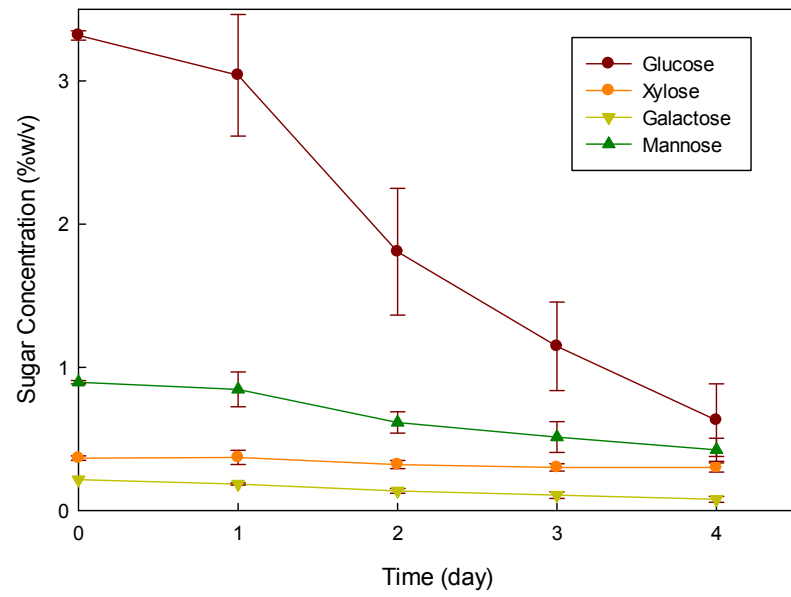

Figure S1B: sugar time profile for acclimated *Y. lipolytica* culture grown on pH profile hydrolysate .

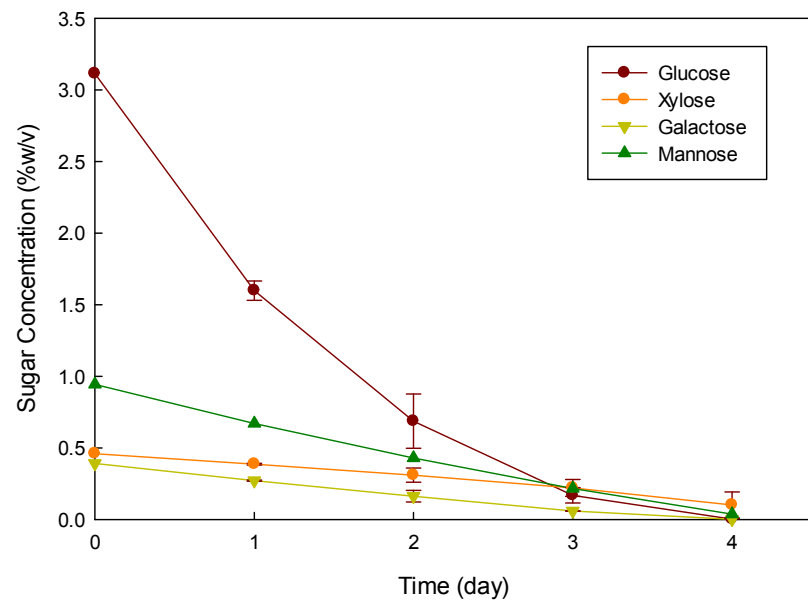

Figure S1C: sugar consumption profile for *Y. lipolytica* culture grown in synthetic control medium.

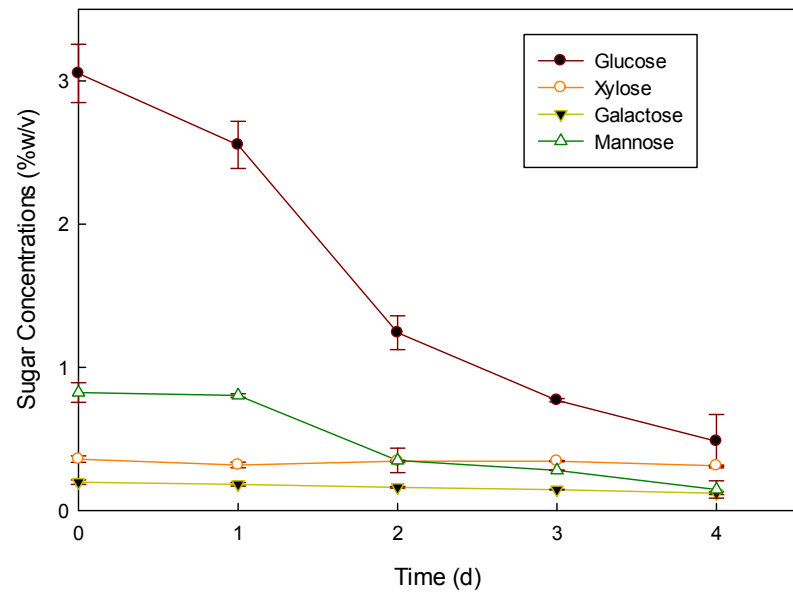

Figure S2A: sugar time profile for acclimated *L. tetrasporus* culture grown on normal hydrolysate .

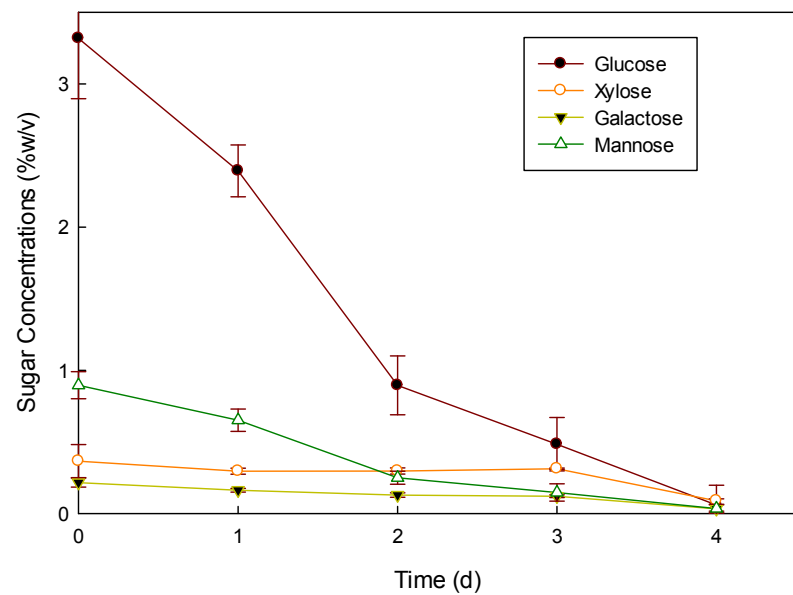

Figure S2B: sugar time profile for acclimated *L. tetrasporus* culture grown on normal hydrolysate.

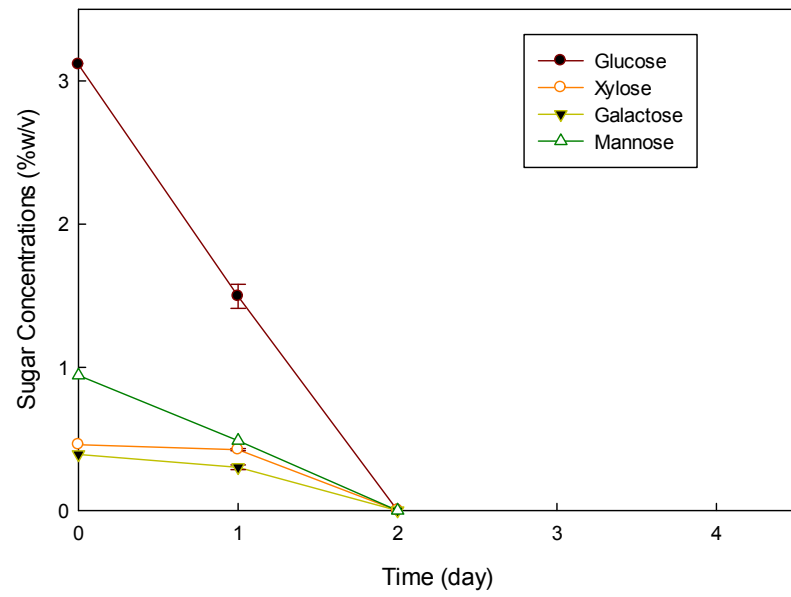

Figure S2C: sugar consumption profile for *L. tetrasporus* culture grown in synthetic control medium.
